# Supplementary material for: Molecular fungal community and its decomposition activity in sapwood and heartwood of 13 temperate European tree species
Source: PubMed Central journal article supplement (PMC6375594; doi:10.1371/journal.pone.0212120), 2019-02-14
Supplement: pone.0212120.s003.pdf [file pone.0212120.s003.pdf]

| Name        | Primer 5'-3'                                                         |
|-------------|----------------------------------------------------------------------|
| P5_5N_ITS4  | ACACTCTTCCCTACACGACGCTCTCCGATCTNNNNNTCCTCCGCTTATTGATATGC             |
| P5_6N_ITS4  | ACACTCTTCCCTACACGACGCTCTCCGATCTNNNNNTCCTCCGCTTATTGATATGC             |
| P7_3N_fITS7 | GTGACTGGAGTTCAGACGTGTGCTCTCCGATCTNNNGTGARTCATCGAATCTTTG              |
| P7_4N_fITS7 | GTGACTGGAGTTCAGACGTGTGCTCTCCGATCTNNNGTGARTCATCGAATCTTTG              |
| P5-index    | AATGATACGGCGACCACCGAGATCTACACiiiiiiiACACTCTTCCCTACACGACGCTCTCCGATC*T |
| P7-index    | CAAGCAGAAGACGGCATAACGAGATiiiiiiiGTGACTGGAGTTCAGACGTGTGCTCTCCGATC*T   |
