# Supplementary material for: Molecular fungal community and its decomposition activity in sapwood and heartwood of 13 temperate European tree species
Source: PubMed Central journal article supplement (PMC6375594; doi:10.1371/journal.pone.0212120), 2019-02-14
Supplement: pone.0212120.s004.pdf [file pone.0212120.s004.pdf]

| Abundant families          | Total          |                  | Sapwood        |                 | Heartwood      |                  |
|----------------------------|----------------|------------------|----------------|-----------------|----------------|------------------|
|                            | R <sup>2</sup> | P                | R <sup>2</sup> | P               | R <sup>2</sup> | P                |
| <i>Meruliaceae</i>         | 0.3216         | <b>0.001</b> *** | 0.0332         | 0.742           | 0.4758         | <b>0.001</b> *** |
| <i>Coniochaetaceae</i>     | 0.1735         | <b>0.002</b> **  | 0.1517         | 0.120           | 0.1935         | <b>0.028</b> *   |
| <i>Herpotrichiellaceae</i> | 0.1568         | <b>0.002</b> **  | 0.2750         | <b>0.022</b> *  | 0.1930         | <b>0.049</b> *   |
| <i>Xylariaceae</i>         | 0.1751         | <b>0.003</b> **  | 0.2682         | <b>0.012</b> *  | 0.3383         | <b>0.001</b> *** |
| <i>Tricholomataceae</i>    | 0.1532         | <b>0.005</b> **  | 0.1966         | 0.052 .         | 0.1716         | 0.059 .          |
| <i>Strophariaceae</i>      | 0.1436         | <b>0.005</b> **  | 0.1136         | 0.187           | 0.1791         | <b>0.049</b> *   |
| <i>Helotiaceae</i>         | 0.1573         | <b>0.006</b> **  | 0.2189         | <b>0.021</b> *  | 0.1803         | 0.051 .          |
| <i>Fomitopsidaceae</i>     | 0.1228         | <b>0.014</b> *   | 0.1722         | 0.080 .         | 0.1318         | 0.150            |
| <i>Diatrypaceae</i>        | 0.1194         | <b>0.020</b> *   | 0.3003         | <b>0.006</b> ** | 0.0719         | 0.439            |
| <i>Polyporaceae</i>        | 0.1164         | <b>0.025</b> *   | 0.0549         | 0.514           | 0.2193         | <b>0.023</b> *   |
| <i>Togniniaceae</i>        | 0.0993         | <b>0.039</b> *   | 0.1210         | 0.169           | 0.0937         | 0.334            |
| <i>Ganodermataceae</i>     | 0.0823         | 0.067 .          | 0.0992         | 0.229           | 0.1549         | 0.056 .          |
| <i>Bondarzewiaceae</i>     | 0.0874         | 0.068 .          | 0.1397         | 0.133           | 0.1144         | 0.230            |
| <i>Exidiaceae</i>          | 0.0817         | 0.091 .          | 0.0576         | 0.476           | 0.1671         | <b>0.044</b> *   |
