# Supplementary material for: Molecular fungal community and its decomposition activity in sapwood and heartwood of 13 temperate European tree species
Source: PubMed Central journal article supplement (PMC6375594; doi:10.1371/journal.pone.0212120), 2019-02-14
Supplement: pone.0212120.s005.pdf [file pone.0212120.s005.pdf]

|                                                      | Total    |          | Sapwood  |          | Heartwood |          |
|------------------------------------------------------|----------|----------|----------|----------|-----------|----------|
|                                                      | <i>P</i> | <i>Q</i> | <i>P</i> | <i>Q</i> | <i>P</i>  | <i>Q</i> |
| <b>Enzyme activity</b>                               |          |          |          |          |           |          |
| Laccase                                              | 0.436    | -0.087   | 0.496    | 0.109    | 0.146     | -0.231   |
| General peroxidase                                   | 0.008    | -0.290   | 0.959    | 0.008    | 0.002     | -0.467   |
| Manganese peroxidase                                 | 0.014    | -0.271   | 0.721    | -0.057   | 0.0004    | -0.529   |
| <i>Endo</i> -1,4- $\beta$ -cellulase                 | 0.003    | -0.328   | 0.320    | -0.159   | 0.0002    | -0.550   |
| <i>Endo</i> -1,4- $\beta$ -xylanase                  | 0.001    | -0.356   | 0.167    | -0.220   | 0.0003    | -0.537   |
| $\beta$ -D-glucosidase                               | 0.0002   | -0.396   | 0.067    | -0.289   | 0.0008    | -0.505   |
| Cellobiohydrolase                                    | 0.004    | -0.318   | 0.349    | -0.150   | 0.0007    | -0.509   |
| $\beta$ -D-xylosidase                                | 0.056    | -0.212   | 0.066    | -0.290   | 0.042     | -0.319   |
| $\beta$ -N-acetylhexosaminidase (Chitinase)          | 0.065    | -0.205   | 0.542    | -0.098   | 0.008     | -0.410   |
| Leucine-aminopeptidase (Peptidase)                   | 0.186    | -0.147   | 0.842    | -0.032   | 0.012     | -0.389   |
| $\beta$ -D-glucuronidase                             | 0.726    | -0.039   | 0.974    | -0.005   | 0.266     | -0.178   |
| $\alpha$ -D-mannosidase                              | 0.703    | -0.043   | 0.518    | -0.104   | 0.672     | 0.068    |
| $\alpha$ -L-arabinosidase                            | 0.090    | -0.188   | 0.716    | -0.059   | 0.027     | -0.345   |
| Acid phosphatase                                     | 0.916    | -0.012   | 0.509    | 0.106    | 0.137     | -0.236   |
| Sulfatase                                            | 0.372    | 0.100    | 0.916    | 0.017    | 0.864     | 0.028    |
| <b>Wood parameter</b>                                |          |          |          |          |           |          |
| pH                                                   | 0.106    | -0.180   | 0.500    | -0.108   | 0.478     | -0.114   |
| Klason lignin (%)                                    | 0.069    | 0.202    | 0.433    | 0.126    | 0.153     | 0.227    |
| Acid soluble lignin (%)                              | 0.107    | -0.179   | 0.676    | -0.067   | 0.192     | -0.208   |
| Organic extractives (%)                              | 0.00001  | 0.466    | 0.010    | 0.396    | 0.0003    | 0.539    |
| Water soluble lignin fragments (mg g <sup>-1</sup> ) | 0.415    | -0.091   | 0.268    | 0.177    | 0.002     | -0.466   |
| Fungal biomass (mg g <sup>-1</sup> )                 | 0.017    | -0.262   | 0.658    | -0.071   | 0.0001    | -0.570   |
| Total N (%)                                          | 0.504    | -0.075   | 0.439    | 0.124    | 0.005     | -0.431   |
| Water content (g g <sup>-1</sup> )                   | 0.088    | 0.190    | 0.034    | 0.332    | 0.820     | -0.037   |
