# Supplementary material for: Molecular fungal community and its decomposition activity in sapwood and heartwood of 13 temperate European tree species
Source: PubMed Central journal article supplement (PMC6375594; doi:10.1371/journal.pone.0212120), 2019-02-14
Supplement: pone.0212120.s006.pdf [file pone.0212120.s006.pdf]

|                                                                        | Total          |           | Sapwood        |           | Heartwood      |           |
|------------------------------------------------------------------------|----------------|-----------|----------------|-----------|----------------|-----------|
|                                                                        | R <sup>2</sup> | P         | R <sup>2</sup> | P         | R <sup>2</sup> | P         |
| <b>Enzyme activity</b>                                                 |                |           |                |           |                |           |
| Laccase                                                                | 0.0694         | 0.126     | 0.1726         | 0.070 .   | 0.1889         | 0.048 *   |
| General peroxidase                                                     | 0.1373         | 0.007 **  | 0.0531         | 0.571     | 0.2355         | 0.017 *   |
| Manganese peroxidase                                                   | 0.2632         | 0.001 *** | 0.1346         | 0.140     | 0.3099         | 0.007 **  |
| <i>Endo</i> -1,4- $\beta$ -cellulase                                   | 0.1288         | 0.023 *   | 0.2425         | 0.014 *   | 0.1449         | 0.125     |
| <i>Endo</i> -1,4- $\beta$ -xylanase                                    | 0.2814         | 0.001 *** | 0.3086         | 0.004 **  | 0.3467         | 0.003 **  |
| $\beta$ -D-glucosidase                                                 | 0.3247         | 0.001 *** | 0.4170         | 0.002 **  | 0.2999         | 0.005 **  |
| Cellobiohydrolase                                                      | 0.3690         | 0.001 *** | 0.4796         | 0.001 *** | 0.3727         | 0.001 *** |
| $\beta$ -D-xylosidase                                                  | 0.1390         | 0.006 **  | 0.0733         | 0.393     | 0.1766         | 0.057 .   |
| $\beta$ -N-acetylhexosaminidase (Chitinase)                            | 0.2305         | 0.001 *** | 0.2799         | 0.006 **  | 0.3999         | 0.001 *** |
| Leucine-aminopeptidase (Peptidase)                                     | 0.1040         | 0.039 *   | 0.0668         | 0.469     | 0.1913         | 0.059 .   |
| $\beta$ -D-glucuronidase                                               | 0.0767         | 0.104     | 0.2376         | 0.022 *   | 0.0377         | 0.685     |
| $\alpha$ -D-mannosidase                                                | 0.0378         | 0.384     | 0.2018         | 0.035 *   | 0.0594         | 0.536     |
| $\alpha$ -L-arabinosidase                                              | 0.0343         | 0.431     | 0.1149         | 0.217     | 0.0516         | 0.594     |
| Acid phosphatase                                                       | 0.1313         | 0.014 *   | 0.1920         | 0.042 *   | 0.2300         | 0.021 *   |
| Sulfatase                                                              | 0.0633         | 0.169     | 0.1442         | 0.118     | 0.0647         | 0.472     |
| <b>Wood parameter</b>                                                  |                |           |                |           |                |           |
| pH                                                                     | 0.4538         | 0.001 *** | 0.4554         | 0.002 **  | 0.6030         | 0.001 *** |
| Klason lignin (%)                                                      | 0.1617         | 0.005 **  | 0.1616         | 0.095 .   | 0.2937         | 0.004 **  |
| Acid-soluble lignin (%)                                                | 0.3961         | 0.001 *** | 0.3057         | 0.004 **  | 0.5120         | 0.001 *** |
| Organic extractives (%)                                                | 0.1267         | 0.019 *   | 0.0492         | 0.596     | 0.2230         | 0.020 *   |
| Water-soluble lignin fragments (mg g <sup>-1</sup> )                   | 0.0642         | 0.170     | 0.0539         | 0.586     | 0.1990         | 0.037 *   |
| Fungal biomass (mg g <sup>-1</sup> ) (deduced from ergosterol content) | 0.1406         | 0.008 **  | 0.1793         | 0.071 .   | 0.2595         | 0.011 *   |
| Total N (%)                                                            | 0.0464         | 0.292     | 0.1626         | 0.078 .   | 0.1405         | 0.131     |
| Species richness                                                       | 0.2123         | 0.001 *** | 0.2509         | 0.009 **  | 0.2989         | 0.003 **  |
| Water content (g g <sup>-1</sup> )                                     | 0.0393         | 0.379     | 0.1325         | 0.152     | 0.0790         | 0.392     |
| <b>Eco-types</b>                                                       |                |           |                |           |                |           |
| WRF                                                                    | 0.1579         | 0.004 **  | 0.2961         | 0.008 **  | 0.0087         | 0.947     |
| BRF                                                                    | 0.1156         | 0.026 *   | 0.1715         | 0.075     | 0.1687         | 0.047 *   |
| SRF                                                                    | 0.2305         | 0.001 *** | 0.0882         | 0.310     | 0.4599         | 0.001 *** |
| Yeast                                                                  | 0.1649         | 0.004 **  | 0.1645         | 0.081     | 0.1792         | 0.055     |
