# Supplementary material for: Molecular fungal community and its decomposition activity in sapwood and heartwood of 13 temperate European tree species
Source: PubMed Central journal article supplement (PMC6375594; doi:10.1371/journal.pone.0212120), 2019-02-14
Supplement: pone.0212120.s007.pdf [file pone.0212120.s007.pdf]

| most abundant families     | Laccase       |               | General peroxidase |               | Manganese peroxidase |               | Endo-1,4- $\beta$ -cellulase |         | Endo-1,4- $\beta$ -xylanase |               | $\beta$ -D-glucosidase |               | Cellobio-hydrolase |               | $\beta$ -D-xylosidase |         |
|----------------------------|---------------|---------------|--------------------|---------------|----------------------|---------------|------------------------------|---------|-----------------------------|---------------|------------------------|---------------|--------------------|---------------|-----------------------|---------|
|                            | p             | q             | p                  | q             | p                    | q             | p                            | q       | p                           | q             | p                      | q             | p                  | q             | p                     | q       |
| <i>Meruliaceae</i>         | 0.4199        | 0.0902        | <b>0.0072</b>      | <b>0.0246</b> | <b>0.0174</b>        | <b>0.2621</b> | 0.3879                       | 0.0966  | 0.2786                      | 0.1211        | 0.3993                 | 0.0943        | 0.0938             | 0.1863        | 0.4482                | 0.0849  |
| <i>Coniochaetaceae</i>     | <b>0.0159</b> | <b>0.2655</b> | 0.5019             | -0.0752       | 0.9081               | 0.0129        | 0.4428                       | 0.0859  | <b>0.0167</b>               | <b>0.2635</b> | <b>0.0050</b>          | <b>0.3071</b> | <b>0.0047</b>      | <b>0.3091</b> | 0.0516                | 0.2157  |
| <i>Herpotrichiellaceae</i> | 0.1274        | 0.1697        | 0.0538             | -0.2137       | 0.1087               | -0.1785       | 0.5067                       | -0.0744 | 0.6375                      | -0.0528       | 0.9329                 | -0.0094       | 0.6131             | 0.0567        | 0.3559                | 0.1032  |
| <i>Xylariaceae</i>         | 0.7097        | 0.0417        | 0.8773             | 0.0173        | 0.4756               | 0.0799        | 0.6013                       | 0.0586  | 0.4470                      | 0.0851        | 0.5868                 | 0.0609        | 0.6005             | -0.0587       | 0.1348                | -0.1665 |
| <i>Hypoxylaceae</i>        | 0.8228        | -0.0251       | 0.2534             | 0.1276        | 0.2743               | 0.1222        | 0.3520                       | 0.1041  | 0.1973                      | 0.1438        | <b>0.0491</b>          | <b>0.2180</b> | 0.0917             | 0.1875        | 0.2347                | 0.1337  |
| <i>Strophariaceae</i>      | 0.0742        | -0.1982       | 0.2988             | -0.1161       | 0.2661               | -0.1242       | 0.0356                       | -0.2345 | 0.0002                      | -0.3963       | 0.0010                 | -0.3579       | 0.0205             | -0.2555       | 0.2290                | -0.1343 |
| <i>Helotiaceae</i>         | 0.2347        | 0.1327        | 0.7048             | 0.0425        | 0.4014               | -0.0939       | 0.0390                       | -0.2285 | 0.0134                      | -0.2721       | 0.0192                 | -0.2581       | 0.0576             | -0.2106       | 0.0240                | -0.2492 |
| <i>Fomitopsidaceae</i>     | 0.6593        | 0.0494        | 0.7778             | 0.0316        | 0.9148               | -0.0120       | 0.6280                       | 0.0543  | 0.1614                      | 0.1561        | 0.8736                 | -0.0178       | 0.2659             | -0.1243       | 0.9343                | 0.0093  |
| <i>Diatrypaceae</i>        | 0.2959        | -0.1260       | 0.1624             | 0.1557        | 0.2740               | 0.1222        | 0.8502                       | 0.0212  | <b>0.0231</b>               | <b>0.2508</b> | 0.1672                 | 0.1540        | 0.1009             | 0.1825        | 0.7172                | 0.0406  |
| <i>Polyporaceae</i>        | 0.3879        | 0.0966        | 0.2543             | 0.1273        | 0.7065               | 0.0422        | 0.5447                       | -0.0678 | 0.9699                      | 0.0042        | 0.7218                 | -0.0399       | 0.5242             | -0.0713       | 0.0918                | -0.1873 |
| <i>Togniniaceae</i>        | 0.1119        | -0.1769       | 0.0079             | -0.2915       | 0.1601               | -0.1666       | 0.5896                       | -0.0604 | 0.3049                      | -0.1147       | 0.8477                 | -0.0215       | 0.3798             | 0.0983        | 0.8943                | -0.0149 |
| <i>Ganodermataceae</i>     | 0.6106        | 0.0571        | 0.9777             | -0.0032       | 0.1159               | 0.1750        | 0.6947                       | 0.0440  | 0.5040                      | -0.0748       | 0.1301                 | 0.1686        | 0.6432             | 0.0519        | 0.6678                | 0.0481  |
| <i>Mycenaceae</i>          | 0.0273        | -0.2437       | 0.1315             | -0.1680       | 0.0014               | -0.3466       | 0.0103                       | -0.2820 | 0.0468                      | -0.2203       | 0.1052                 | -0.1802       | 0.0020             | -0.3370       | 0.5659                | -0.0643 |
| <i>Helotiales_I.S.</i>     | 0.1713        | 0.1525        | 0.1335             | -0.1671       | 0.6181               | -0.0559       | 0.1769                       | -0.1506 | 0.2092                      | -0.1402       | 0.0608                 | -0.2080       | 0.0845             | -0.1917       | 0.9623                | -0.0053 |
| <i>Schizoporaceae</i>      | 0.8464        | 0.0217        | 0.2281             | 0.1346        | 0.2650               | 0.1245        | 0.3763                       | -0.0990 | 0.4041                      | -0.0934       | 0.2981                 | -0.1163       | 0.3601             | -0.1024       | 0.0011                | -0.3532 |
| <i>Stereaceae</i>          | 0.2670        | 0.1240        | 0.7087             | 0.0419        | 0.2442               | -0.1301       | 0.2203                       | -0.1368 | 0.7020                      | -0.0429       | 0.4997                 | -0.0756       | 0.0538             | -0.2138       | 0.0036                | -0.3179 |
| <i>Chaetosphaeriaceae</i>  | 0.5954        | -0.0595       | 0.0922             | -0.1872       | 0.5102               | -0.0738       | 0.0723                       | -0.1996 | 0.0621                      | -0.2070       | 0.2620                 | -0.1253       | 0.0820             | -0.1932       | 0.4159                | -0.0911 |
| <i>Psathyrellaceae</i>     | 0.4188        | 0.0905        | 0.1274             | 0.1697        | 0.8740               | 0.0178        | 0.4257                       | 0.0892  | 0.7785                      | -0.0315       | 0.9098                 | 0.0127        | 0.5968             | -0.0593       | 0.4047                | -0.0932 |
| <i>Bondarzewiaceae</i>     | 0.0385        | -0.2291       | 0.6430             | -0.0520       | 0.4833               | -0.0785       | 0.6958                       | 0.0438  | 0.1129                      | -0.1764       | 0.5339                 | -0.0697       | 0.8868             | 0.0160        | 0.8201                | 0.0255  |
| <i>Exidiaceae</i>          | 0.7501        | 0.0357        | 0.4926             | -0.0768       | 0.7792               | -0.0314       | 0.0287                       | -0.2417 | 0.0093                      | -0.2855       | 0.1263                 | -0.1702       | 0.2291             | -0.1342       | 0.0082                | -0.2900 |
| <i>Amylostereaceae</i>     | 0.4270        | -0.0890       | 0.2243             | 0.1356        | 0.6293               | -0.0541       | 0.0294                       | -0.2497 | 0.0824                      | -0.1930       | 0.0934                 | -0.1865       | 0.0912             | -0.1877       | 0.0262                | -0.2455 |
| <i>Tympanidaceae</i>       | 0.5154        | -0.0729       | 0.0036             | -0.3180       | 0.0095               | -0.2846       | 0.0141                       | -0.2701 | 0.0065                      | -0.2983       | 0.0025                 | -0.3289       | 0.0487             | -0.2184       | 0.3770                | -0.0988 |
| <b>eco-types</b>           |               |               |                    |               |                      |               |                              |         |                             |               |                        |               |                    |               |                       |         |
| <i>WRF</i>                 | 0.4141        | -0.0914       | <b>0.0165</b>      | <b>0.2640</b> | <b>0.0073</b>        | <b>0.2942</b> | 0.7482                       | 0.0359  | 0.2631                      | -0.1250       | 0.3800                 | -0.0982       | 0.1542             | -0.1283       | 0.5416                | -0.0684 |
| <i>BRF</i>                 | 0.1401        | -0.1644       | 0.2926             | -0.1176       | 0.4005               | -0.0941       | 0.8275                       | 0.0244  | 0.5608                      | 0.0652        | 0.3482                 | -0.1049       | 0.3955             | -0.0951       | 0.6291                | 0.0541  |
| <i>SRF</i>                 | 0.4015        | 0.0939        | 0.9217             | -0.0110       | 0.1881               | -0.1468       | 0.9723                       | 0.0039  | 0.9952                      | -0.0007       | 0.3356                 | 0.1077        | 0.5353             | 0.0694        | 0.9187                | 0.0114  |

| most abundant families     | β-N-acetyl-hexosaminidase |               | Leucine-aminopeptidase |         | β-D-glucuronidase |         | α-D-mannosidase |               | α-L-arabinosidase |               | Acid phosphatase       |               | Sulfatase |         |
|----------------------------|---------------------------|---------------|------------------------|---------|-------------------|---------|-----------------|---------------|-------------------|---------------|------------------------|---------------|-----------|---------|
|                            | p                         | q             | p                      | q       | p                 | q       | p               | q             | p                 | q             | p                      | q             | p         | q       |
| <i>Meruliaceae</i>         | 0.3827                    | 0.0977        | 0.1125                 | 0.1766  | 0.6681            | 0.0481  | 0.3011          | -0.1156       | 0.1151            | 0.1754        | 0.5086                 | 0.0740        | 0.5902    | -0.0603 |
| <i>Coniochaetaceae</i>     | <b>0.0037</b>             | <b>0.3170</b> | 0.9848                 | 0.0021  | 0.1934            | 0.1451  | <b>0.0194</b>   | <b>0.2577</b> | 0.0356            | -0.2322       | <b>0.0034</b>          | <b>0.3202</b> | 0.1785    | 0.1500  |
| <i>Herpotrichiellaceae</i> | 0.9803                    | 0.0028        | 0.0493                 | -0.2179 | 0.5654            | -0.0644 | 0.9606          | 0.0055        | 0.9963            | -0.0005       | 0.4455                 | 0.0854        | 0.6075    | -0.0576 |
| <i>Xylariaceae</i>         | 0.1930                    | -0.1452       | 0.3955                 | -0.0951 | 0.1394            | -0.1646 | 0.1561          | -0.1581       | 0.2275            | 0.1347        | 0.4836                 | -0.0784       | 0.3396    | -0.1068 |
| <i>Hypoxylaceae</i>        | 0.0778                    | 0.1959        | 0.6288                 | 0.0542  | 0.1320            | 0.1678  | 0.8181          | 0.0258        | 0.1019            | 0.1819        | <b>0.0382</b>          | <b>0.2294</b> | 0.5486    | 0.0672  |
| <i>Strophariaceae</i>      | 0.0957                    | -0.1853       | 0.0078                 | -0.2921 | 0.0940            | -0.1862 | 0.4118          | -0.0919       | 0.3918            | -0.0958       | 4.827 e <sup>-05</sup> | -0.4331       | 0.4612    | -0.0825 |
| <i>Helotiaceae</i>         | 0.0226                    | -0.2516       | 0.1896                 | -0.1463 | 0.0307            | -0.2388 | 0.2419          | -0.1307       | 0.4259            | -0.0891       | 0.3951                 | -0.0951       | 0.0450    | -0.2220 |
| <i>Fomitopsidaceae</i>     | 0.8039                    | -0.0278       | 0.8264                 | 0.0246  | 0.1963            | 0.1442  | 0.1557          | 0.1582        | 0.4959            | -0.0763       | 0.0854                 | 0.1911        | 0.1286    | 0.1692  |
| <i>Diatrypaceae</i>        | 0.5255                    | 0.0711        | 0.3497                 | -0.1046 | 0.8469            | -0.0217 | 0.1673          | -0.1540       | 0.3502            | 0.1045        | 0.1823                 | 0.1488        | 0.5223    | -0.0717 |
| <i>Polyporaceae</i>        | 0.3086                    | -0.1138       | 0.8526                 | 0.0208  | 0.6412            | 0.0522  | 0.5129          | 0.0732        | 0.8253            | -0.0247       | 0.1207                 | 0.1727        | 0.7387    | -0.0374 |
| <i>Togniniaceae</i>        | 0.2348                    | 0.1327        | 0.2160                 | -0.1381 | 0.6370            | -0.0529 | 0.3618          | 0.1020        | 0.0575            | -0.2107       | 0.6807                 | -0.0461       | 0.6598    | 0.0493  |
| <i>Ganodermataceae</i>     | 0.5519                    | 0.0666        | 0.5206                 | 0.0720  | 0.6708            | -0.0476 | 0.5945          | 0.0596        | 0.8819            | -0.0166       | 0.4719                 | -0.0805       | 0.8924    | 0.0152  |
| <i>Mycenaceae</i>          | 0.0480                    | -0.2191       | 0.4677                 | -0.0813 | 0.3361            | -0.1076 | 0.6617          | -0.0490       | 0.4741            | -0.0802       | 0.4475                 | -0.0850       | 0.7720    | 0.0325  |
| <i>Helotiales_I.S.</i>     | 0.7813                    | -0.0311       | 0.2370                 | 0.1095  | 0.7705            | -0.0327 | 0.6013          | 0.0586        | 0.0720            | -0.1997       | 0.8399                 | 0.0227        | 0.7274    | -0.0371 |
| <i>Schizoporaceae</i>      | 0.2244                    | -0.1356       | 0.0827                 | -0.1928 | 0.4549            | -0.0837 | 0.3222          | -0.1107       | <b>0.0203</b>     | <b>0.2559</b> | 0.4729                 | -0.0804       | 0.0694    | -0.2015 |
| <i>Stereaceae</i>          | 0.1010                    | -0.1824       | 0.0218                 | -0.2531 | 0.0867            | -0.1904 | 0.6292          | 0.0541        | 0.9321            | -0.0096       | 0.6319                 | 0.0537        | 0.5080    | -0.0741 |
| <i>Chaetosphaeriaceae</i>  | 0.6489                    | -0.0510       | 0.8711                 | 0.0182  | 0.8137            | 0.0264  | 0.4936          | 0.0767        | 0.0836            | -0.1922       | 0.4988                 | -0.0757       | 0.5845    | 0.0613  |
| <i>Psathyrellaceae</i>     | 0.8104                    | -0.0269       | 0.8824                 | -0.0166 | 0.6100            | -0.0572 | 0.0835          | -0.1923       | <b>0.0081</b>     | <b>0.2904</b> | 0.5638                 | -0.0647       | 0.2363    | -0.1323 |
| <i>Bondarzewiaceae</i>     | 0.7985                    | -0.0286       | 0.2923                 | -0.1177 | 0.9301            | 0.0098  | 0.9317          | -0.0096       | 0.8561            | -0.0203       | 0.0325                 | -0.2364       | 0.5921    | -0.0600 |
| <i>Exidiaceae</i>          | 0.1868                    | -0.1473       | 0.0518                 | -0.2156 | 0.0051            | -0.3068 | 0.1752          | -0.1512       | 0.9736            | -0.0037       | 0.0072                 | -0.2948       | 0.0201    | -0.2563 |
| <i>Amylostereaceae</i>     | 0.0290                    | -0.2413       | 0.6418                 | -0.0521 | 0.0878            | -0.1807 | 0.0543          | -0.2133       | 0.6093            | 0.0573        | 0.0094                 | -0.2851       | 0.0475    | -0.2195 |
| <i>Tympanidaceae</i>       | 0.0689                    | -0.2019       | 0.4223                 | -0.0898 | 0.3321            | -0.1085 | 0.7831          | -0.0309       | 0.1175            | -0.1742       | 0.6159                 | -0.0562       | 0.5017    | -0.0752 |
| <b>eco-type</b>            |                           |               |                        |         |                   |         |                 |               |                   |               |                        |               |           |         |
| <i>WRF</i>                 | 0.2504                    | -0.1283       | 0.3282                 | 0.1093  | 0.6475            | -0.0512 | 0.8016          | -0.0282       | 0.8591            | -0.0199       | 0.0640                 | -0.2055       | 0.2566    | -0.1267 |
| <i>BRF</i>                 | 0.5363                    | -0.0693       | 0.6859                 | 0.0453  | 0.8690            | 0.0184  | 0.8676          | 0.0187        | 0.6738            | 0.0472        | 0.5400                 | 0.0686        | 0.3148    | 0.1124  |
| <i>SRF</i>                 | 0.7204                    | -0.0401       | 0.1861                 | -0.1475 | 0.4859            | -0.0780 | 0.7903          | -0.0298       | 0.4389            | -0.0867       | 0.1310                 | 0.1682        | 0.6557    | -0.0499 |
